# Supplementary material
Source: publisher site journal article supplement (https://www.spandidos-publications.com/8639/downloadSupplementary)
Supplement: Supplementary file 1 [file downloadSupplementary]

Video S1. Echocardiography after administering adriamycin. Echocardiography revealed diffuse hypokinesis with a left ventricular ejection fraction of 15%, left atrial dilatation, and left ventricular dilatation, indicative of cardiomyopathy. LA, left atrium; LV, left ventricle.

Video S2. Serial echocardiography from CCU discharge to 6 months after discharge. (A) LVEF was 35% at CCU discharge. (B) LVEF was 45% at discharge. (C) LVEF was 57% at 6 months after discharge. LVEF, left ventricular ejection fraction; CCU, coronary care unit.
